# Supplementary material for: A platform for curated products from novel open reading frames prompts reinterpretation of disease variants
Source: HighWire-hosted journal article supplement (doi:10.1101/gr.263202.120), 2021-01-19
Supplement: Supplemental_Table_S1.xlsx [file Supplemental_Table_S1.xlsx]

## Sheet: Sheet1
Supplemental Table S1. UK Biobank traits analyzed
UK Biobank Trait	N	In Meta-Analysis
Age at Menarche	214860	Yes
Age at Menopause	127546	Yes
Age First Birth (Female)	151847	Yes
All autoimmune diseases	408963	Yes
Asthma	408454	Yes
Balding Type I	186506	Yes
Balding Type IV	186506	No
Basal Metabolic Rate	401832	No
BMI	407667	Yes
Cardiovascular Diseases	408963	Yes
College Education	405140	Yes
Diastolic Blood Pressure	376437	No
Eczema	408454	Yes
Eosinophil Count	391787	Yes
FEV1-FVC Ratio	331786	Yes
Forced Vital Capacity (FVC)	331786	Yes
Heel T Score	397274	Yes
Height	408092	Yes
High Cholesterol	408963	No
High Light Scatter Reticulocyte Count	389745	No
Lymphocyte Count	395342	No
Mean Corpular Hemoglobin	395248	No
Mean Platelet Volume	396435	No
Mean Sphered Cell Volume	389812	No
Monocyte Count	394149	No
Morning Person	365245	Yes
Neuroticism	332313	Yes
Number Children (Pooled)	406636	Yes
Platelet Count	395747	Yes
Platelet Distribution Width	396008	No
Red Blood Cell Count	396464	Yes
Red Blood Cell Distribution Width	394258	Yes
Smoking Status	407527	Yes
Sunburn Occasion	305327	Yes
Systolic Blood Pressure	376437	Yes
Thyroid	408963	No
Type 2 Diabetes	408963	Yes
Waist-hip Ratio	408196	Yes
White Blood Cell Count	395835	Yes
Years of Education	405140	No
