# Supplementary material for: A platform for curated products from novel open reading frames prompts reinterpretation of disease variants
Source: HighWire-hosted journal article supplement (doi:10.1101/gr.263202.120), 2021-01-19
Supplement: Supplemental_Table_S2.xlsx [file Supplemental_Table_S2.xlsx]

## Sheet: Sheet1
Supplemental Table S2. CVE and LFVE of baseline-LF and custom annotations for meta-analysis of UK Biobank traits
Trait	Source	Annotation	Proportion common SNPs	CVE	CVE_se	CVE_p	Proportion lowfrq SNPs	LFVE	LFVE_se	LFVE_p	LFVE/CVE
Meta-Analysis	Baseline-LF	Coding_UCSC	0.0148	5.92	0.41	1.09e-15	0.0183	15.19	1.17	1.02e-34	2.56
Meta-Analysis	Baseline-LF	Coding_UCSC.extend500bp	0.0656	2.24	0.2	8.47e-11	0.0724	4.37	0.5	1.94e-12	1.95
Meta-Analysis	Baseline-LF	Conserved_LindbladToh	0.0276	8.18	0.54	7.26e-19	0.0344	14.3	0.88	2.72e-69	1.75
Meta-Analysis	Baseline-LF	Conserved_LindbladToh.extend500bp	0.3461	1.8	0.05	1.55e-20	0.3602	1.92	0.12	3.58e-14	1.07
Meta-Analysis	Baseline-LF	CTCF_Hoffman	0.0239	0.49	0.25	0.00963	0.0237	-0.13	0.97	0.211	-0.26
Meta-Analysis	Baseline-LF	CTCF_Hoffman.extend500bp	0.0707	0.64	0.12	0.00616	0.0702	0.5	0.34	0.0952	0.79
Meta-Analysis	Baseline-LF	DGF_ENCODE	0.1431	2.53	0.29	3.48e-09	0.1468	2.58	0.3	5.18e-08	1.02
Meta-Analysis	Baseline-LF	DGF_ENCODE.extend500bp	0.5537	1.4	0.07	7.75e-13	0.5577	1.41	0.11	0.000534	1
Meta-Analysis	Baseline-LF	DHS_peaks_Trynka	0.1182	2.31	0.3	3.32e-07	0.1208	3.37	0.39	1.24e-09	1.46
Meta-Analysis	Baseline-LF	DHS_Trynka	0.1773	2.01	0.22	2.5e-07	0.1804	2.91	0.33	2.87e-09	1.45
Meta-Analysis	Baseline-LF	DHS_Trynka.extend500bp	0.5167	1.42	0.05	2.86e-13	0.5185	1.38	0.11	0.00161	0.97
Meta-Analysis	Baseline-LF	Enhancer_Andersson	0.0045	2.57	0.92	0.139	0.0047	4.56	2.52	0.0639	1.78
Meta-Analysis	Baseline-LF	Enhancer_Andersson.extend500bp	0.0196	2.71	0.44	5.28e-05	0.0198	2.4	0.71	0.0125	0.89
Meta-Analysis	Baseline-LF	Enhancer_Hoffman	0.0437	3.36	0.31	4.25e-12	0.0454	2.65	0.56	0.00219	0.79
Meta-Analysis	Baseline-LF	Enhancer_Hoffman.extend500bp	0.0919	2.79	0.26	2.73e-17	0.0944	3.32	0.38	5.02e-10	1.19
Meta-Analysis	Baseline-LF	FetalDHS_Trynka	0.0896	2.81	0.27	3.61e-10	0.0928	3.62	0.51	1.13e-07	1.29
Meta-Analysis	Baseline-LF	FetalDHS_Trynka.extend500bp	0.2961	1.76	0.11	4.02e-12	0.2991	1.64	0.18	0.000804	0.93
Meta-Analysis	Baseline-LF	H3K27ac_Hnisz	0.3977	1.69	0.09	2.63e-24	0.4052	1.74	0.11	6.54e-12	1.03
Meta-Analysis	Baseline-LF	H3K27ac_Hnisz.extend500bp	0.4292	1.63	0.08	1.14e-21	0.4365	1.68	0.11	2.01e-10	1.03
Meta-Analysis	Baseline-LF	H3K27ac_PGC2	0.2739	2.05	0.13	1.5e-19	0.2817	2.2	0.19	5.79e-10	1.07
Meta-Analysis	Baseline-LF	H3K27ac_PGC2.extend500bp	0.3406	1.82	0.1	4.4e-22	0.3489	1.91	0.14	2.2e-12	1.05
Meta-Analysis	Baseline-LF	H3K4me1_peaks_Trynka	0.1805	2.29	0.12	8.22e-13	0.1893	2.36	0.26	4.96e-08	1.03
Meta-Analysis	Baseline-LF	H3K4me1_Trynka	0.4448	1.73	0.08	8.42e-19	0.456	1.67	0.1	2.85e-10	0.96
Meta-Analysis	Baseline-LF	H3K4me1_Trynka.extend500bp	0.625	1.35	0.04	1.95e-20	0.6331	1.34	0.04	1.84e-15	0.99
Meta-Analysis	Baseline-LF	H3K4me3_peaks_Trynka	0.043	3.07	0.36	1.31e-07	0.0463	4.06	0.65	1.16e-06	1.32
Meta-Analysis	Baseline-LF	H3K4me3_Trynka	0.1369	2.76	0.21	2.98e-18	0.1453	3.24	0.34	2.54e-11	1.17
Meta-Analysis	Baseline-LF	H3K4me3_Trynka.extend500bp	0.2595	2.08	0.14	7.29e-20	0.2684	2.08	0.18	1.11e-09	1
Meta-Analysis	Baseline-LF	H3K9ac_peaks_Trynka	0.0403	3.99	0.31	6.45e-10	0.0434	4.53	0.68	8.73e-08	1.14
Meta-Analysis	Baseline-LF	H3K9ac_Trynka	0.1303	2.98	0.29	4.14e-18	0.1377	3.88	0.37	1.26e-14	1.3
Meta-Analysis	Baseline-LF	H3K9ac_Trynka.extend500bp	0.2352	2.05	0.14	8.76e-19	0.2442	2.48	0.2	6.16e-14	1.21
Meta-Analysis	Baseline-LF	Intron_UCSC	0.3934	1.15	0.02	2.22e-10	0.4079	0.94	0.05	0.23	0.82
Meta-Analysis	Baseline-LF	Intron_UCSC.extend500bp	0.4029	1.26	0.02	1.2e-20	0.4195	1.49	0.06	1.09e-19	1.18
Meta-Analysis	Baseline-LF	PromoterFlanking_Hoffman	0.0085	2.13	0.6	0.0616	0.0092	-1.39	1.27	0.129	-0.65
Meta-Analysis	Baseline-LF	PromoterFlanking_Hoffman.extend500bp	0.0332	1.75	0.24	0.0103	0.0349	0.08	0.56	0.213	0.05
Meta-Analysis	Baseline-LF	Promoter_UCSC	0.0461	2.17	0.2	6.6e-07	0.0486	2.71	0.44	6.02e-05	1.25
Meta-Analysis	Baseline-LF	Promoter_UCSC.extend500bp	0.0567	2.22	0.19	1.7e-10	0.0597	1.98	0.33	0.00107	0.9
Meta-Analysis	Baseline-LF	Repressed_Hoffman	0.4563	0.66	0.06	8.74e-09	0.4397	0.51	0.1	9.07e-07	0.77
Meta-Analysis	Baseline-LF	Repressed_Hoffman.extend500bp	0.7166	0.67	0.04	7.14e-26	0.6966	0.53	0.05	1.08e-19	0.79
Meta-Analysis	Baseline-LF	SuperEnhancer_Hnisz	0.1705	2.06	0.13	7.26e-27	0.1754	2.1	0.16	6.75e-12	1.02
Meta-Analysis	Baseline-LF	SuperEnhancer_Hnisz.extend500bp	0.1736	2.07	0.13	2.21e-28	0.1786	2.14	0.18	7.13e-11	1.03
Meta-Analysis	Baseline-LF	TFBS_ENCODE	0.1367	2.5	0.26	9.01e-11	0.1398	2.73	0.29	3.78e-10	1.09
Meta-Analysis	Baseline-LF	TFBS_ENCODE.extend500bp	0.3525	1.57	0.09	1.22e-11	0.3553	1.38	0.12	0.000584	0.88
Meta-Analysis	Baseline-LF	Transcr_Hoffman	0.3492	1.16	0.04	0.00186	0.3667	1.31	0.1	0.0111	1.13
Meta-Analysis	Baseline-LF	Transcr_Hoffman.extend500bp	0.7684	0.94	0.01	0.000123	0.7751	0.97	0.04	0.294	1.04
Meta-Analysis	Baseline-LF	TSS_Hoffman	0.0181	5.81	0.62	8.29e-14	0.0195	7.74	0.93	1.84e-12	1.33
Meta-Analysis	Baseline-LF	TSS_Hoffman.extend500bp	0.0343	4.45	0.43	8.39e-18	0.0363	5	0.68	8.05e-09	1.12
Meta-Analysis	Baseline-LF	UTR_3_UCSC	0.0115	4.07	0.27	6.7e-12	0.0131	4.73	1.01	0.000376	1.16
Meta-Analysis	Baseline-LF	UTR_3_UCSC.extend500bp	0.0267	2.34	0.19	1.1e-08	0.0297	3.73	0.59	5.53e-06	1.59
Meta-Analysis	Baseline-LF	UTR_5_UCSC	0.0055	3.96	0.6	0.000267	0.0062	9.18	1.65	8.91e-09	2.32
Meta-Analysis	Baseline-LF	UTR_5_UCSC.extend500bp	0.0272	2.23	0.25	3.02e-06	0.0288	4.16	0.58	6.36e-09	1.86
Meta-Analysis	Baseline-LF	WeakEnhancer_Hoffman	0.0221	2.15	0.32	0.00101	0.0228	2.91	0.81	0.00708	1.35
Meta-Analysis	Baseline-LF	WeakEnhancer_Hoffman.extend500bp	0.0911	1.68	0.1	2.47e-07	0.0923	1.37	0.3	0.183	0.81
Meta-Analysis	Baseline-LF	Super_Enhancer_Vahedi	0.021	3.35	0.29	4.69e-20	0.0225	2.73	0.44	6.96e-05	0.81
Meta-Analysis	Baseline-LF	Super_Enhancer_Vahedi.extend500bp	0.0214	3.27	0.28	3.14e-20	0.023	2.97	0.46	1.87e-05	0.91
Meta-Analysis	Baseline-LF	Typical_Enhancer_Vahedi	0.0218	2.21	0.23	7.49e-08	0.0223	2.12	0.46	0.00772	0.96
Meta-Analysis	Baseline-LF	Typical_Enhancer_Vahedi.extend500bp	0.026	2.2	0.24	3.35e-07	0.0266	2.3	0.42	0.000362	1.05
Meta-Analysis	Baseline-LF	GERP_RSsup4	0.0088	8.8	0.83	8.08e-13	0.012	22.29	1.53	2.83e-52	2.53
Meta-Analysis	Baseline-LF	phastCons_Vertebrates	0.0323	6.57	0.44	1.13e-17	0.0394	12.02	0.77	1.58e-65	1.83
Meta-Analysis	Baseline-LF	phastCons_Vertebrates.extend500bp	0.4216	1.53	0.04	7.41e-16	0.4358	1.51	0.11	2.7e-07	0.99
Meta-Analysis	Baseline-LF	phastCons_Mammals	0.0246	8.69	0.54	1.44e-18	0.0312	15.38	0.95	6.92e-75	1.77
Meta-Analysis	Baseline-LF	phastCons_Mammals.extend500bp	0.3547	1.87	0.07	1.28e-19	0.3692	2.11	0.15	2.22e-12	1.13
Meta-Analysis	Baseline-LF	phastCons_Primates	0.0212	10.03	0.76	4.48e-19	0.0282	17.81	1.02	3.15e-91	1.77
Meta-Analysis	Baseline-LF	phastCons_Primates.extend500bp	0.1857	2.97	0.1	1.15e-23	0.2002	3.78	0.23	1.29e-32	1.27
Meta-Analysis	Baseline-LF	BivFlnk	0.0138	6.3	0.58	4.43e-14	0.0147	6.14	1.02	2.29e-07	0.97
Meta-Analysis	Baseline-LF	BivFlnk.extend500bp	0.0313	3.91	0.31	1.6e-16	0.0323	4.56	0.55	6.43e-12	1.17
Meta-Analysis	Baseline-LF	Coding_synonymous	0.0033	3.83	0.97	0.202	0.0038	6.15	2.42	0.0302	1.61
Meta-Analysis	Baseline-LF	Coding_nonsynonymous	0.0027	7.94	0.92	3.35e-08	0.0045	41.02	2.71	1.06e-62	5.17
Meta-Analysis	Custom	gencode.v31lift37.transcribed	0.5918	1.2	0.01	1.36e-24	0.6069	1.32	0.03	4.54e-26	1.1
Meta-Analysis	Custom	gencode.v31lift37.CDS	0.0067	5.52	0.65	7.16e-07	0.0092	23.57	2.03	1.02e-31	4.27
Meta-Analysis	Custom	gencode.v31lift37.UTR3	0.0112	3.57	0.25	3.27e-12	0.0126	3.99	0.86	0.000202	1.12
Meta-Analysis	Custom	gencode.v31lift37.UTR5	0.0027	5.67	1.16	0.00142	0.0029	2.83	2.66	0.319	0.5
Meta-Analysis	Custom	nORFs_all	0.0035	6.05	1.19	0.000781	0.0043	17.55	3	1.4e-08	2.9
Meta-Analysis	Custom	nORFs_noCDS	0.0022	3.23	1.19	0.289	0.0024	2.3	3.04	0.627	0.71
Meta-Analysis	Custom	nORFs_altCDS	0.0013	9.22	1.61	0.000179	0.0019	30.69	4.51	1.1e-11	3.33
