# Supplementary material for: A platform for curated products from novel open reading frames prompts reinterpretation of disease variants
Source: HighWire-hosted journal article supplement (doi:10.1101/gr.263202.120), 2021-01-19
Supplement: Supplemental_Table_S3.xlsx [file Supplemental_Table_S3.xlsx]

## Sheet: Sheet1
Supplemental Table S3. MAPS results for gnomAD exomes
Canonical_csq	nORF_csq	singleton_count	expected_singletons	variant_count	ps	maps	maps_sem	maps_upper	maps_lower	pVal_vs_nonCoding	pVal_vs_syn	bothSignifAfterCor
3'UTR	non-coding	120173	120713	236007	0.509193	-0.00228637	0.00102904	-0.000269446	-0.0043033	NA	NA	NA
3'UTR	missense	7580	7613.9	14906	0.50852	-0.00227425	0.00409474	0.00575144	-0.0102999	0.4981	0.2041	FALSE
3'UTR	stop gained	402	391.73	766	0.524804	0.0134073	0.0180435	0.0487726	-0.0219579	0.1839	0.118	FALSE
3'UTR	stop lost	382	369.15	656	0.582317	0.0195884	0.0192553	0.0573289	-0.0181521	0.1292	0.085	FALSE
3'UTR	synonymous	2681	2727.5	5446	0.492288	-0.00853838	0.00677454	0.00473971	-0.0218165	NA	NA	NA
5'UTR	non-coding	58051	59806.1	113661	0.510738	-0.0154415	0.00148274	-0.0125354	-0.0183477	NA	NA	NA
5'UTR	missense	19361	20350	37910	0.51071	-0.0260881	0.0025674	-0.021056	-0.0311202	0.9997	0.1976	FALSE
5'UTR	stop gained	1142	1154.2	2167	0.526996	-0.0056299	0.0107252	0.0153915	-0.0266514	0.1738	0.0148	FALSE
5'UTR	stop lost	519	508.68	902	0.575388	0.0114412	0.0164579	0.0436986	-0.0208162	0.0547	0.0081	FALSE
5'UTR	synonymous	5221	5540.6	10405	0.501778	-0.030716	0.00490169	-0.0211087	-0.0403233	NA	NA	NA
intergenic	non-coding	758	817.29	1568	0.483418	-0.0378125	0.01262	-0.0130774	-0.0625476	NA	NA	NA
intron	non-coding	1347063	1356910	2596098	0.51888	-0.003793	0.000310098	-0.00318521	-0.00440079	NA	NA	NA
intron	missense	25007	25103	47797	0.523192	-0.00200849	0.00228456	0.00246924	-0.00648623	0.2048	0.0509	FALSE
intron	stop gained	1162	1155.7	2160	0.537963	0.00291667	0.0107272	0.023942	-0.0181087	0.265	0.1369	FALSE
intron	stop lost	1595	1558.5	2769	0.57602	0.0131817	0.00939139	0.0315888	-0.00522547	0.0376	0.0139	FALSE
intron	synonymous	9808	9979.6	19312	0.507871	-0.00888567	0.00359751	-0.00183454	-0.0159368	NA	NA	NA
missense	non-coding	1987758	1848346	3757430	0.529021	0.037103	0.000257509	0.0376077	0.0365983	NA	NA	NA
missense	missense	400740	359080	726134	0.551882	0.0573723	0.000583594	0.0585162	0.0562285	< 0.0001	< 0.0001	TRUE
missense	stop gained	28270	24883	48345	0.584755	0.070059	0.00224111	0.0744515	0.0656664	< 0.0001	< 0.0001	TRUE
missense	stop lost	13705	12119	21562	0.635609	0.0735553	0.00327744	0.0799791	0.0671316	< 0.0001	< 0.0001	TRUE
missense	synonymous	189008	170070	365533	0.517075	0.0518093	0.00082652	0.0534293	0.0501893	NA	NA	NA
ncRNA	non-coding	247042	248752	484366	0.510032	-0.00353039	0.000718283	-0.00212255	-0.00493822	NA	NA	NA
ncRNA	missense	15777	15872	30946	0.509824	-0.00306986	0.00284174	0.00249994	-0.00863967	0.4327	0.0766	FALSE
ncRNA	stop gained	789	790.08	1530	0.515686	-0.000705882	0.0127765	0.024336	-0.0257477	0.4089	0.2259	FALSE
ncRNA	stop lost	420	413.13	734	0.572207	0.00935967	0.0182619	0.0451529	-0.0264336	0.2398	0.1432	FALSE
ncRNA	synonymous	5890	6013.2	11967	0.492187	-0.010295	0.00457009	-0.00133761	-0.0192523	NA	NA	NA
synonymous	non-coding	804600	806148	1681030	0.478635	-0.000920864	0.000385288	-0.0001657	-0.00167603	NA	NA	NA
synonymous	missense	242343	241770	506307	0.478648	0.00113172	0.000702048	0.00250774	-0.000244289	0.004	0.3737	FALSE
synonymous	stop gained	16753	16112	36872	0.454356	0.0173845	0.00259301	0.0224668	0.0123022	< 0.0001	< 0.0001	TRUE
synonymous	stop lost	5881	5636.4	10092	0.582739	0.024237	0.00490854	0.0338578	0.0146163	< 0.0001	< 0.0001	TRUE
synonymous	synonymous	12680	12679	23374	0.542483	4.27826e-05	0.00325859	0.00642963	-0.00634406	NA	NA	NA
