# Supplementary material for: A platform for curated products from novel open reading frames prompts reinterpretation of disease variants
Source: HighWire-hosted journal article supplement (doi:10.1101/gr.263202.120), 2021-01-19
Supplement: Supplemental_Table_S4.xlsx [file Supplemental_Table_S4.xlsx]

## Sheet: Sheet1
Supplemental Table S4. MAPS results for gnomAD genomes
Canonical_csq	nORF_csq	singleton_count	expected_singletons	variant_count	ps	maps	maps_sem	maps_upper	maps_lower	pVal_vs_nonCoding	pVal_vs_syn	bothSignifAfterCorrection
3'UTR	non-coding	1169155	1177072	2156059	0.542265	-0.00367198	0.000339299	-0.00300695	-0.004337	NA	NA	NA
3'UTR	missense	25575	25782	47641	0.536828	-0.004345	0.00228454	0.000132697	-0.00882269	0.6205	0.4256	FALSE
3'UTR	stop gained	1330	1327	2459	0.54087	0.00122001	0.0100493	0.0209166	-0.0184766	0.3049	0.2739	FALSE
3'UTR	stop lost	458	468.62	817	0.560588	-0.0129988	0.0173639	0.0210344	-0.047032	0.7079	0.6705	FALSE
3'UTR	synonymous	10141	10240	19167	0.529086	-0.00516513	0.00360543	0.00190151	-0.0122318	NA	NA	NA
5'UTR	non-coding	338915	338893	609960	0.555635	3.60679e-05	0.00063623	0.00128308	-0.00121094	NA	NA	NA
5'UTR	missense	60996	60493	107563	0.567072	0.00467633	0.00151076	0.00763742	0.00171524	0.0023	0.4839	FALSE
5'UTR	stop gained	3170	3021.9	5383	0.588891	0.0275125	0.00670631	0.0406569	0.0143682	0.0001	0.0007	TRUE
5'UTR	stop lost	1036	997.3	1737	0.596431	0.0222798	0.0117717	0.0453523	-0.000792738	0.0268	0.0764	FALSE
5'UTR	synonymous	18083	17938	31993	0.565217	0.00453224	0.00277151	0.0099644	-0.000899917	NA	NA	NA
intergenic	non-coding	36063326	37729639	68246723	0.528426	-0.024416	6.04263e-05	-0.0242976	-0.0245345	NA	NA	NA
intergenic	missense	3055	3294	5989	0.510102	-0.0399065	0.00645958	-0.0272457	-0.0525673	0.995	0.7315	FALSE
intergenic	stop gained	184	182.64	333	0.552553	0.00408408	0.0272481	0.0574903	-0.0493221	0.133	0.0976	FALSE
intergenic	stop lost	100	88.921	155	0.645161	0.0714774	0.0384312	0.146803	-0.00384771	0.003	0.005	FALSE
intergenic	synonymous	1166	1240.3	2284	0.510508	-0.0325306	0.0104599	-0.0120293	-0.053032	NA	NA	NA
intron	non-coding	53361043	55098500	100305407	0.531986	-0.0173217	4.98216e-05	-0.017224	-0.0174193	NA	NA	NA
intron	missense	24528	24754	44811	0.547366	-0.0050434	0.00235137	-0.000434727	-0.00965208	< 0.0001	0.4828	FALSE
intron	stop gained	1145	1123.5	2031	0.563762	0.0105859	0.0110041	0.032154	-0.0109821	0.006	0.0842	FALSE
intron	stop lost	920	906.21	1579	0.582647	0.00873338	0.0124098	0.0330565	-0.0155898	0.015	0.139	FALSE
intron	synonymous	9864	9959.2	18154	0.543351	-0.00524402	0.00369696	0.00200203	-0.0124901	NA	NA	NA
missense	non-coding	686931	626670	1186078	0.579162	0.0508069	0.000453316	0.0516954	0.0499184	NA	NA	NA
missense	missense	121937	105670	198864	0.613168	0.0817996	0.00109213	0.0839402	0.0796591	< 0.0001	0.3898	FALSE
missense	stop gained	7459	6487.8	11963	0.623506	0.0811836	0.00442975	0.089866	0.0725013	< 0.0001	0.511	FALSE
missense	stop lost	2971	2640.6	4604	0.645308	0.0717637	0.00705085	0.0855833	0.057944	0.0022	0.9022	FALSE
missense	synonymous	63799	55128	106651	0.598203	0.0813026	0.00150122	0.084245	0.0783602	NA	NA	NA
ncRNA	non-coding	1565531	1601360	2941840	0.53216	-0.0121791	0.000290911	-0.0116089	-0.0127493	NA	NA	NA
ncRNA	missense	68989	70299	129368	0.533277	-0.0101262	0.00138705	-0.00740753	-0.0128448	0.0736	0.2871	FALSE
ncRNA	stop gained	3528	3536.7	6542	0.539285	-0.00132987	0.00616269	0.010749	-0.0134087	0.0401	0.054	FALSE
ncRNA	stop lost	936	966.92	1686	0.55516	-0.0183393	0.0121027	0.00538202	-0.0420606	0.6774	0.7092	FALSE
ncRNA	synonymous	26422	27006	50405	0.524194	-0.0115862	0.00222446	-0.00722621	-0.0159461	NA	NA	NA
synonymous	non-coding	308962	310125	595551	0.518783	-0.00195332	0.000647446	-0.000684322	-0.00322231	NA	NA	NA
synonymous	missense	86614	85712	164831	0.525472	0.00547227	0.00122995	0.00788297	0.00306158	< 0.0001	0.5324	FALSE
synonymous	stop gained	6435	6140.7	12307	0.522873	0.0239132	0.00450235	0.0327378	0.0150886	< 0.0001	0.0076	FALSE
synonymous	stop lost	1398	1398.7	2445	0.571779	-0.000286299	0.0100071	0.0193276	-0.0199002	0.4304	0.707	FALSE
synonymous	synonymous	4157	4113.7	7332	0.566967	0.00590562	0.00578666	0.0172475	-0.00543624	NA	NA	NA
