# Supplementary material for: A platform for curated products from novel open reading frames prompts reinterpretation of disease variants
Source: HighWire-hosted journal article supplement (doi:10.1101/gr.263202.120), 2021-01-19
Supplement: Supplemental_Table_S5.xlsx [file Supplemental_Table_S5.xlsx]

## Sheet: Sheet1
Supplemental Table S5. Number of COSMIC variants with deleterious consequences in nORFs but benign or missense consequences in canonical frames.
Canonical Csq	nORF csq	Variant Count
3'UTR	frameshift	3694
3'UTR	stop gained	369
3'UTR	stop lost	147
5'UTR	frameshift	6194
5'UTR	stop gained	814
5'UTR	stop lost	272
intergenic	frameshift	22
intergenic	stop gained	26
intergenic	stop lost	12
intron	frameshift	1426
intron	stop gained	308
intron	stop lost	336
missense	stop gained	49380
missense	stop lost	16347
ncRNA	frameshift	2004
ncRNA	stop gained	1802
ncRNA	stop lost	517
synonymous	stop gained	20721
synonymous	stop lost	4898
