# Supplementary material for: A platform for curated products from novel open reading frames prompts reinterpretation of disease variants
Source: HighWire-hosted journal article supplement (doi:10.1101/gr.263202.120), 2021-01-19
Supplement: Supplemental_Table_S6.xlsx [file Supplemental_Table_S6.xlsx]

## Sheet: Sheet1
Supplemental Table S6. Number of HGMD and Clinvar mutations with deleterious consequences in nORFs but benign or missense consequences in canonical frames.
Canonical Csq	nORF csq	Variant Count
3'UTR	frameshift	123
3'UTR	stop gained	37
3'UTR	stop lost	14
5'UTR	frameshift	178
5'UTR	stop gained	144
5'UTR	stop lost	44
intron	frameshift	64
intron	stop gained	14
intron	stop lost	25
missense	stop gained	3316
missense	stop lost	1541
ncRNA	frameshift	13
ncRNA	stop gained	12
ncRNA	stop lost	3
synonymous	stop gained	1306
synonymous	stop lost	287
