# Supplementary material for: A platform for curated products from novel open reading frames prompts reinterpretation of disease variants
Source: HighWire-hosted journal article supplement (doi:10.1101/gr.263202.120), 2021-01-19
Supplement: Supplemental_Table_S7.xlsx [file Supplemental_Table_S7.xlsx]

## Sheet: Sheet1
Supplemental Table S7: Cancer genes with benign COSMIC mutation consequences in CDS but with deleterious consequences in the nORF
Gene	Count
TTN	27
TP53	13
EGFR	11
FAT1	10
MACF1	10
TSC2	9
NOTCH1	8
ANK2	7
MYC	7
NEB	7
NLRP2	7
CREBBP	6
ANAPC5	5
DST	5
EXT1	5
NF1	5
AR1D1A	4
ATM	4
CTNNA2	4
JAK1	4
