# Supplementary material for: A platform for curated products from novel open reading frames prompts reinterpretation of disease variants
Source: HighWire-hosted journal article supplement (doi:10.1101/gr.263202.120), 2021-01-19
Supplement: Supplemental_Table_S8.xlsx [file Supplemental_Table_S8.xlsx]

## Sheet: Sheet1
Supplemental Table S8. HGMD disease mutations potentially explained by nORF consequences
Chr	Pos	HGMD ID	Phenotype	Canonical gene	Canonical csq	nORF	nORF csq
1	9943503	CR1512291	Leber_congenital_amaurosis	NMNAT1	5'UTR	03utH1	stop gained
1	161306880	CS093741	Charcot-Marie-Tooth_disease_type_1B	MPZ	synonymous	2nmsH1	stop gained
2	32154498	CS099016	Spastic_paraplegia_autosomal_dominant	SPAST	3'UTR	3c21H3	stop gained
2	202377196	CR1724031	Pulmonary_arterial_hypertension	BMPR2	5'UTR	3yobH1	stop gained
2	202519034	CS1724033	Pulmonary_arterial_hypertension	BMPR2	synonymous	3yp7H1	stop lost
3	98591170	CS991361	Coproporphyria	CPOX	intron	6sngH2	stop gained
5	126568296	CM188397	Epileptic_encephalopathy_early_onset	ALDH7A1	synonymous	9rpsH2	stop gained
5	126568296	CS075064	Alpha-AASA_dehydrogenase_deficiency	ALDH7A1	synonymous	9rpsH2	stop gained
7	65967767	CS951430	Mucopolysaccharidosis_VII	GUSB	synonymous	bicoH1	stop gained
10	43114490	CS1815922	Medullary_thyroid_carcinoma_modifier_of	RET	synonymous	cza0H2	stop gained
10	87863608	CR032091	Cowden_disease	PTEN	upstream gene	d4ahH4	stop gained
11	5225490	CR016252	Beta_thalassaemia	HBB	3'UTR	e0xmH1	stop lost
11	5225740	CS910621	Beta_thalassaemia	HBB	intron	e0xoH3	stop gained
11	64807945	CM193341	Multiple_endocrine_neoplasia_1	MEN1	synonymous	ebn5H1	stop gained
11	65526207	CS191427	Cerebellar_ataxia_recurrent_liver_failure_peripheral_neuropathy_and_short_stature	SCYL1	synonymous	dsozH1	stop gained
11	67487155	CS104882	Pituitary_adenoma	AIP	synonymous	dtmmH10	stop gained
11	67490807	CM1719875	Pituitary_adenoma	AIP	synonymous	dtmxH2	stop gained
11	67490807	CS083216	Pituitary_adenoma	AIP	synonymous	dtmxH2	stop gained
13	32363194	CS118467	Breast_cancer	BRCA2	synonymous	ffolH1	stop gained
15	48437004	CS118012	Marfan_syndrome	FBN1	synonymous	glykH1	stop gained
15	72349093	CS045964	Gangliosidosis_GM2	HEXA	synonymous	gplmH1	stop gained
16	1772656	CS1712625	Leigh_syndrome	MRPS34	ncRNA	h3xwH8	stop gained
16	67436355	CS032075	Apparent_mineralocorticoid_excess	HSD11B2	synonymous	gyrvH1	stop gained
17	31095037	CR168102	Neurofibromatosis_1	NF1	5'UTR	hjvhH1	stop lost
17	50196377	HS030003	Osteogenesis_imperfecta_I	COL1A1	ncRNA	i4ymH2	stop gained
19	11089544	CR055625	Hypercholesterolaemia	LDLR	5'UTR	intuH2	stop gained
19	11089596	CM1618236	Hypercholesterolaemia	LDLR	synonymous	intuH2	stop gained
19	11105413	CM071832	Hypercholesterolaemia	LDLR	synonymous	intvH6	stop gained
19	11105527	CS081932	Hypercholesterolaemia	LDLR	synonymous	intvH7	stop gained
19	12806748	CS137971	Aicardi-Goutières_syndrome	RNASEH2A	synonymous	ioeeH1	stop gained
19	48965344	CR138623	Hyperferritinaemia-cataract_syndrome	FTL	5'UTR	iugxH1	stop gained
19	48965347	CR971944	Hyperferritinaemia-cataract_syndrome	FTL	5'UTR	iugxH1	stop gained
19	54122591	CM1723658	Retinitis_pigmentosa	PRPF31	synonymous	ivpbH1	stop gained
22	29636891	CS982284	Neurofibromatosis_2	NF2	intron	jwrsH3	stop gained
