# Supplementary material for: A platform for curated products from novel open reading frames prompts reinterpretation of disease variants
Source: HighWire-hosted journal article supplement (doi:10.1101/gr.263202.120), 2021-01-19
Supplement: Supplemental_Table_S9.xlsx [file Supplemental_Table_S9.xlsx]

## Sheet: Sheet1
Supplemental Table S9. ClinVar pathogenic mutations potentially explained by nORF consequences
Chr	Pos	ClinVar ID	Phenotype	Canonical Gene	Canonical Csq	nORF	nORF csq
1	161306880	14200	Charcot-Marie-Tooth_disease,_demyelinating,_type_1b	MPZ	synonymous	2nmsH1	stop gained
5	126568296	18002	Pyridoxine-dependent_epilepsy|	ALDH7A1	synonymous	9rpsH2	stop gained
7	65967767	901	Mucopolysaccharidosis_type_VII	GUSB	synonymous	bicoH1	stop gained
8	22130605	7344	Hypotrichosis_4	HR	5'UTR	byilH1	stop lost
8	22130702	7342	Hypotrichosis_4	HR	5'UTR	byilH1	stop gained
10	87863608	7845	Cowden_syndrome_1	PTEN	upstream gene	d4ahH4	stop gained
11	5225740	36313	beta_Thalassemia|	HBB	intron	e0xoH3	stop gained
11	67487155	41169	Somatotroph_adenoma	AIP	synonymous	dtmmH10	stop gained
15	72349093	3943	Gm2-gangliosidosis,_subacute	HEXA	synonymous	gplmH1	stop gained
16	1772656	438633	Combined_oxidative_phosphorylation_deficiency_32	MRPS34	ncRNA	h3xwH8	stop gained
19	11105527	3747	Familial_hypercholesterolemia	LDLR	synonymous	intvH7	stop gained
19	12806748	66065	Aicardi_Goutieres_syndrome_4	RNASEH2A	synonymous	ioeeH1	stop gained
19	48965344	96691	Hyperferritinemia_cataract_syndrome	FTL	5'UTR	iugxH1	stop gained
19	48965347	16480	Hyperferritinemia_cataract_syndrome	FTL	5'UTR	iugxH1	stop gained
